# Supplementary material
Source: PubMed Central journal article supplement (PMC4649949)
Supplement: NIHMS733704-supplement-Supplement.pdf [file NIHMS733704-supplement-Supplement.pdf]

## **SUPPLEMENTARY INFORMATION**

### **Patient description and recruitment**

The CAPRI-T was one of two (along with the CAPRI-NK, see reference [29]) basic immunological studies nested within the CAMELIA trial. Patients who agreed to participate in the CAPRI studies enrolled through a consent process that was independent of the parental CAMELIA study. We note that the CAPRI-NK recruited patients from June of 2007 to August of 2008, while the CAPRI-T recruited patients from January of 2008 to May of 2009. During the time that the two sub-studies overlapped (between January 2008 and August 2008), patients were randomly assigned to the CAPRI-NK or CAPRI-T study at the time they enrolled in the CAMELIA trial. Once the CAPRI-NK study finished recruiting patients, all newly enrolled CAMELIA patients were offered enrollment in the CAPRI-T study. No other selection was performed.

After approximately 50% of the enrollment of the CAPRI-T was met, it was observed that the majority of TB-IRIS patients developed TB-IRIS within 21 days post-ART initiation. Based on these observations, the CAPRI-T protocol was modified to add blood draws at week 4 and week 10 post-TB treatment initiation, which corresponded to 2 weeks after ART initiation in each CAMELIA treatment arm. This strategy resulted in a control sample drawn from non-TB-IRIS patients at the approximate time TB-IRIS occurred in those patients who experienced TB-IRIS. Indeed, the median time of TB-IRIS at the end of the study was determined to be 12 days (IQR: 7-24 days). The amended study protocol was approved by the CAMELIA Scientific Advisory Board, the National Ethics Committee of

Cambodia, and the other institutional review boards that are noted in the Methods section of the main text.

As described [1], TB was treated with a standard daily regimen of isoniazid, rifampin, ethambutol, and pyrazinamide for the first 2 months followed by daily administration of isoniazid and rifampin during the ensuing 4 months. HIV was treated with stavudine, lamivudine, and efavirenz initiated at 2 weeks (CAMELIA early arm) or 8 weeks (CAMELIA late arm) after TB treatment onset.

TB-IRIS was defined as unexplained worsening or emergence of symptoms or signs of TB (e.g. fever, cough, shortness of breath, new lymph node enlargement or exacerbation of disease at other extra pulmonary sites) that occurred after ART initiation, which could not be attributed to an etiology other than TB [1, 7]. Each case of suspected TB-IRIS reported by on-site treating physicians was subsequently validated by at least two experienced physicians who were members of the study team and who were not involved in the daily care of the patients. Reviewers had full access to medical record documents and outcomes, and the validation process was not blinded [1, 7]. Patients who had at any time been suspected of experiencing IRIS or TB-IRIS, even if not subsequently validated, were excluded from further analysis.

### **Strategy employed to identify early post-ART phenotypic and cytokine parameters associated with TB-IRIS**

Among the 50 TB-IRIS patients, 36 experienced the TB-IRIS event within 3 weeks of ART initiation with a median of 10 days (IQR: 6-14), as compared to

the larger group of 50 TB-IRIS patients who experienced TB-IRIS with a median of 12 days (IQR: 7-24) post-ART initiation. This subgroup of 36 TB-IRIS patients who developed TB-IRIS within the three weeks of initiating ART were compared to patients for whom we had a week 2 blood draw to investigate phenotypic and cytokine changes between ART initiation and TB-IRIS. The addition of the week 2 post-ART timepoint as described above (and in the Methods) provided a non-TB-IRIS timepoint that was comparable to the time of TB-IRIS occurrence in both the early and late CAMELIA treatment arms. Focusing on the subgroup of 36 TB-IRIS patients who experienced TB-IRIS within 3 weeks thus allowed us to evaluate immune parameters associated with TB-IRIS between ART initiation and the TB-IRIS event and compare these to findings to the non-TB-IRIS control patient group sampled at ART initiation and the new week 2 timepoint.

Among the 36 TB-IRIS patients in this subgroup, CD4+ T cell counts and BMI were similar at ART initiation to the overall group of 50 TB-IRIS patients and to the non-TB-IRIS patient group. We note, however, that viral load was higher in this subgroup of 36 TB-IRIS patients compared to the non-TB-IRIS group (median: 6.0 versus 5.7 log copies/ml, respectively;  $p=0.006$ ). This difference was larger than that seen when the overall group of 50 TB-IRIS patients was compared to non-TB-IRIS patients (median: 5.9 vs. 5.7 log copies/ml, respectively;  $p=0.040$ ).

## SUPPLEMENTARY FIGURES AND TABLES

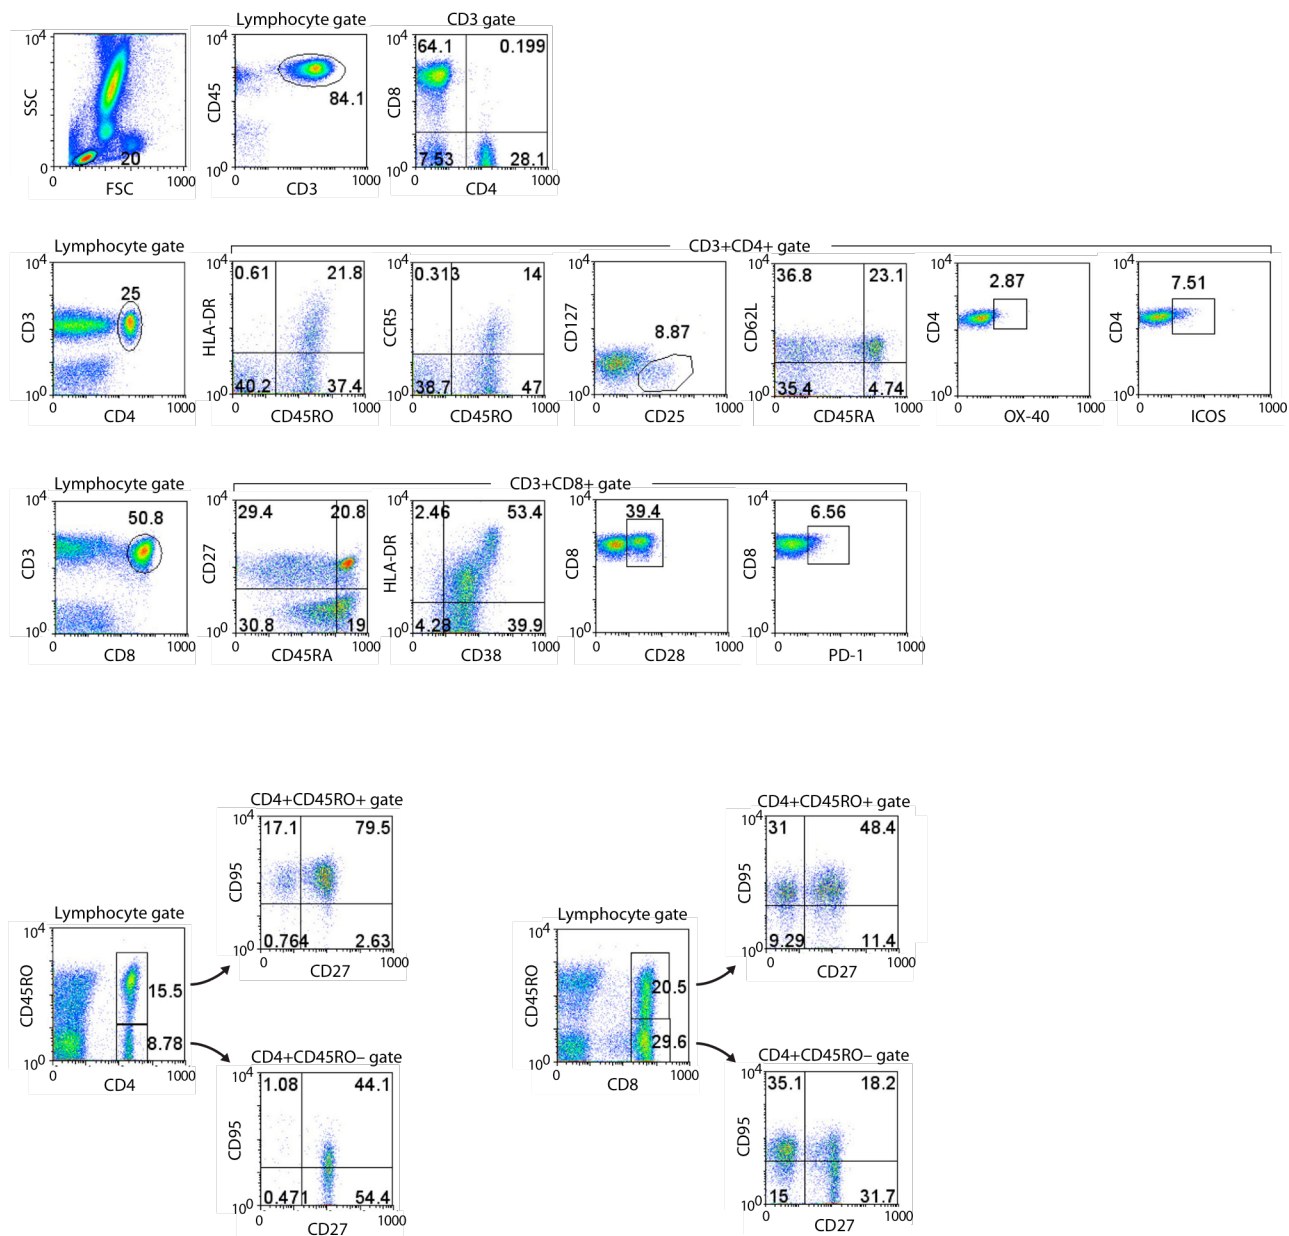

**Supplementary Figure 1. A representative example of the gating strategy used in the immunophenotypic analyses.** Gating strategies to define each T cell subpopulation evaluated in the study are shown.

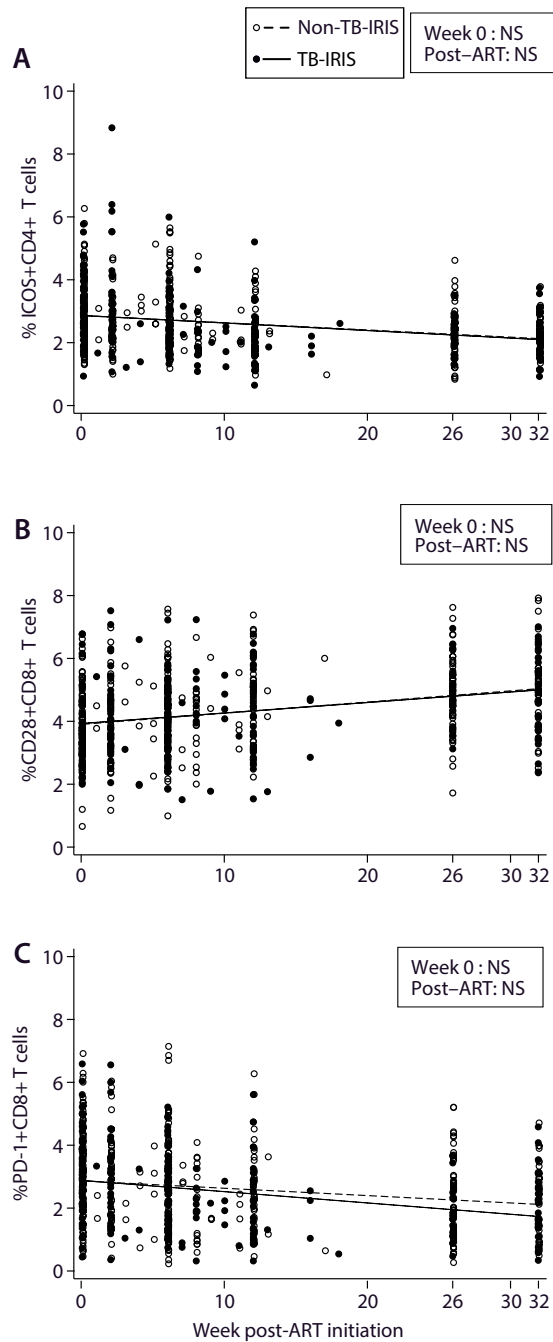

**Supplementary Figure 2. Mixed linear regression analysis of ICOS<sup>+</sup>CD4<sup>+</sup>, CD28<sup>+</sup>CD8<sup>+</sup>, and PD-1<sup>+</sup>CD8<sup>+</sup> T cell co-stimulatory markers in TB-IRIS and non-TB-IRIS patients.** T cell immunophenotypes were obtained by staining of whole blood samples. Since the percentages were not normally distributed they were plotted with square root transformation. TB-IRIS patients (filled circles and solid line) and non-TB-IRIS patients (open circles and dashed line) are shown at the time of sample analysis post-ART initiation. A) ICOS+CD4+ T cells; B) CD28+CD8+ T cells; C) PD-1+CD8+ T cells. NS=not significant. P- and q-values are shown in Suppl. Tables 2 and 3.

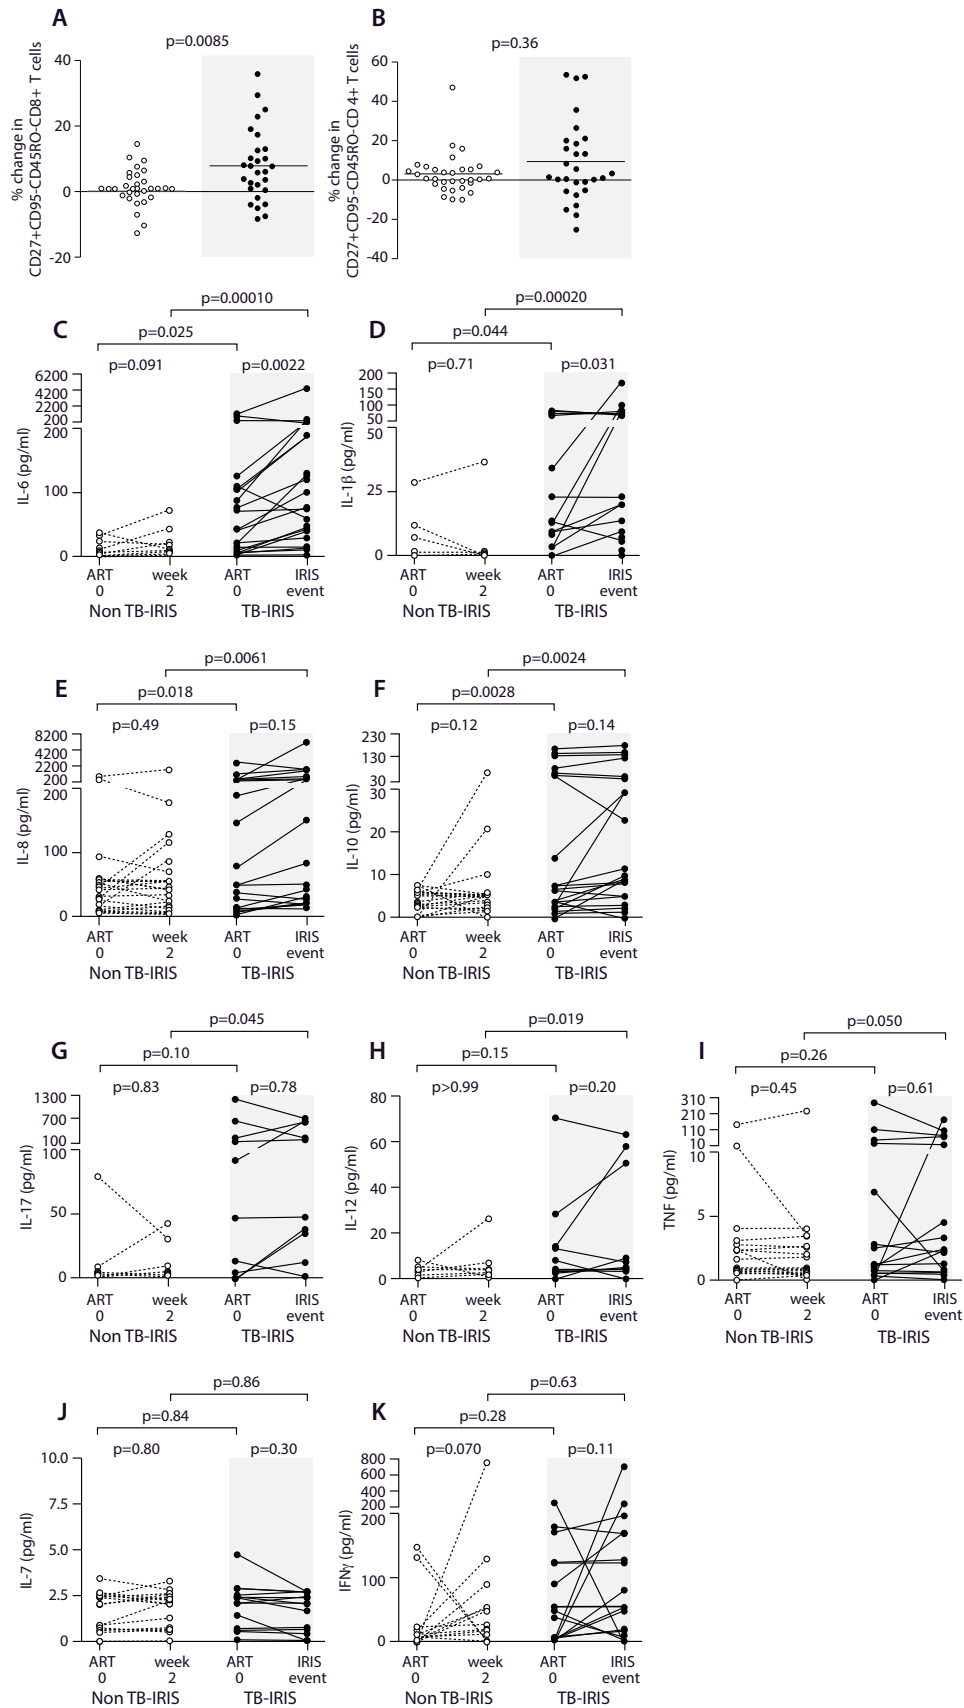

**Supplementary Figure 3: Legend on next page**

**Supplementary Figure 3. Changes in cellular phenotype and circulating plasma cytokine levels between ART initiation and the week 2 timepoint or the TB-IRIS event.**

*Changes in CD27+CD95-CD45RO-CD8+ T cells (A) and in CD27+CD95-CD45RO-CD4+ T cells (B) between ART initiation and the week 2 timepoint or the TB-IRIS event.*

Wilcoxon rank sum tests were used to compare the net percent change in frequency of CD27+CD95-CD45RO-CD8+ T cells (A) and in CD27+CD95-CD45RO-CD4+ T cells (B) between ART initiation and the week 2 timepoint for 28 non-TB-IRIS patients (open circles) or ART initiation and the TB-IRIS event (median=10 days) for 32 TB-IRIS patients who experienced TB-IRIS within 21 days of ART initiation (filled circles). Although the CD27+CD95-CD45RO-CD8+ T cell subpopulation bears hallmarks of naïve cells, the significantly greater net increase in CD27+CD95-CD45RO-CD8+ T cell proportions during the first two weeks of ART in the TB-IRIS patient group may also represent a  $\gamma/\delta$  T cell expansion, since a proportion of V $\delta$ 1  $\gamma/\delta$  T cells are CD8+ (see supplemental references 1 and 2), which are mostly CD45RA+ [supplemental reference 1) and, in HIV patients, are also CD27+ (supplemental reference 3). P and q values for these analyses are presented in Suppl. Table 4.

*Changes in levels of IL-6 (C), IL-1 $\beta$  (D), IL-8 (E), IL-10 (F), IL-17 (G), IL-12 (H), TNF (I), IL-7 (J), and IFN- $\gamma$  (K) between ART initiation and the week 2 timepoint or the TB-IRIS event.*

The Wilcoxon signed-rank test for paired samples was used to compare changes in plasma cytokine level between week 0 and week 2 of ART in non-TB-IRIS patients (n=19) (open circles) and between week 0 of ART and the TB-IRIS event in TB-IRIS patients (n=23) (closed circles). The Wilcoxon rank sum test was used to compare cytokine levels at week 0 between the two groups and at week 2 or the TB-IRIS event in the two patient groups. P and q values for these analyses are presented in Suppl. Table 5.

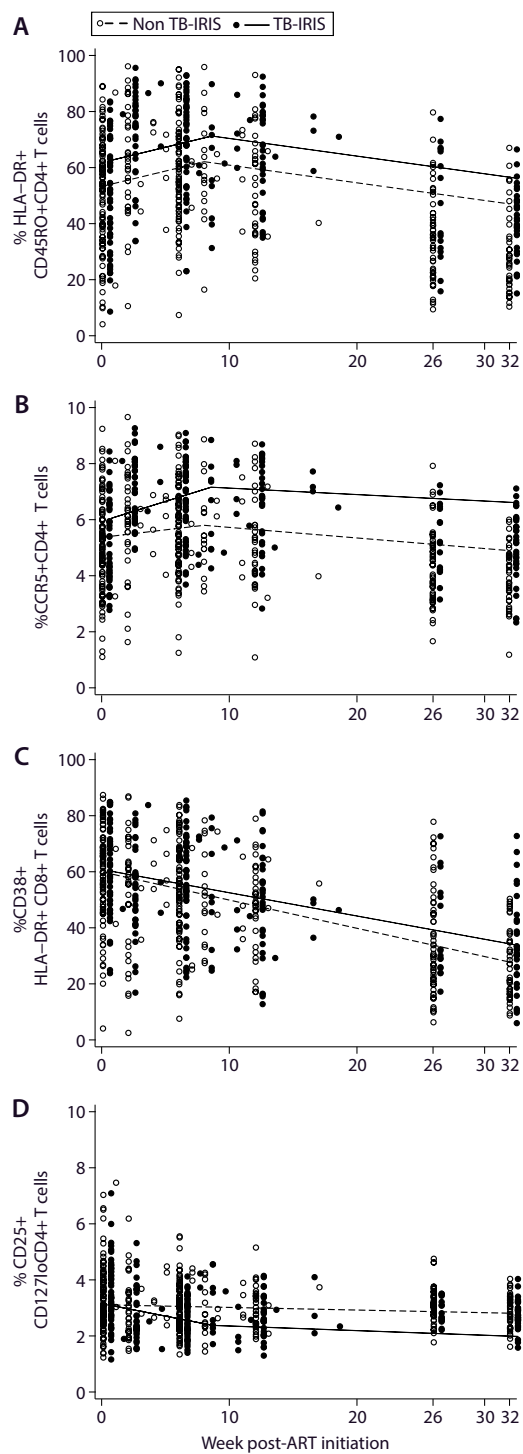

**Supplementary Figure 4. Markers of CD4<sup>+</sup> and CD8<sup>+</sup> T-cell activation and regulatory activity in TB-IRIS and non-TB-IRIS patients at each timepoint displayed side-by-side to distinguish the spread of data within each group (based on data shown in Fig. 2 of the main text). A) Activated (CD45RO+HLA-DR+) CD4+ T cells; B) CCR5+CD4+ T cells; C) Activated (CD38+HLA-DR+) CD8+ T cells; D) CD4+ regulatory T cells.**



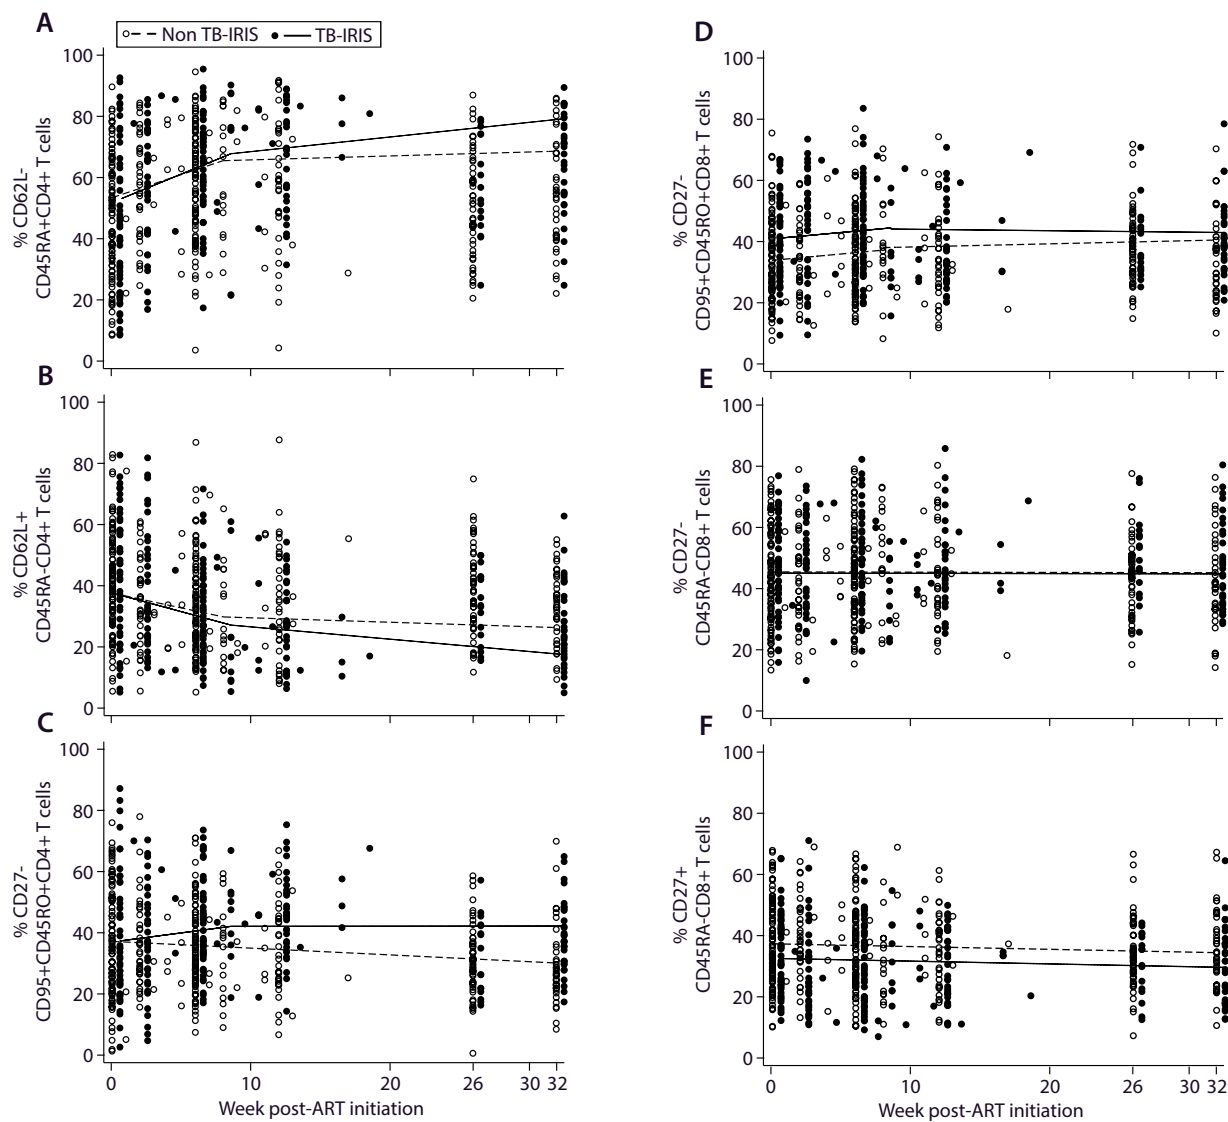

**Supplementary Figure 5. Markers of CD4<sup>+</sup> and CD8<sup>+</sup> T-cell memory differentiation in TB-IRIS and non-TB-IRIS patients at each timepoint displayed side-by-side to distinguish the spread of data within each group (based on data shown in Fig. 3 of the main text). A) Effector memory (CD62L<sup>-</sup>CD45RA<sup>+</sup>) CD4<sup>+</sup> T cells; B) Central memory (CD62L<sup>+</sup>CD45RA<sup>-</sup>) CD4<sup>+</sup> T cells; C) Fas<sup>+</sup> effector memory (CD27<sup>-</sup>CD95<sup>+</sup>CD45RO<sup>+</sup>) CD4<sup>+</sup> T cells; D) Fas<sup>+</sup> effector memory (CD27<sup>-</sup>CD95<sup>+</sup>CD45RO<sup>+</sup>) CD8<sup>+</sup> T cells; E) Effector memory (CD27<sup>-</sup>CD45RA<sup>-</sup>) CD8<sup>+</sup> T cells; F) Transitional/early effector memory (CD27<sup>+</sup>CD45RA<sup>-</sup>) CD8<sup>+</sup> T cells.**

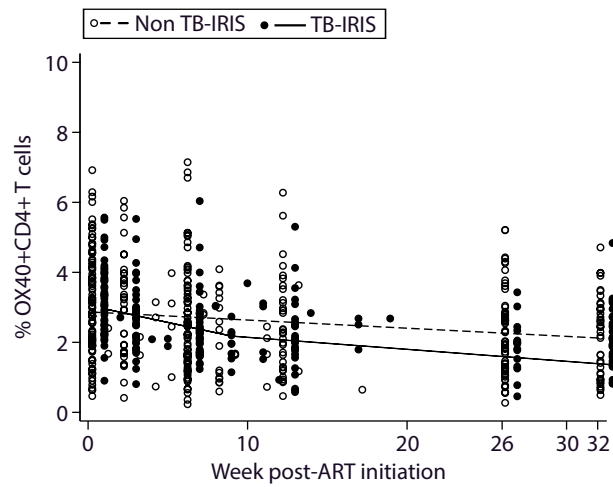

**Supplementary Figure 6. Differences in OX40<sup>+</sup>CD4<sup>+</sup> T-cell frequencies between TB-IRIS and non-TB-IRIS patients at each timepoint displayed side-by-side to distinguish the spread of data within each group (based on data shown in Fig. 4 of the main text).**

**Supplementary Table 1.**

| Mix                                | FITC    | PE      | PerCP   | APC     |                                              |
|------------------------------------|---------|---------|---------|---------|----------------------------------------------|
| <b>General lymphocytes markers</b> |         |         |         |         |                                              |
| 1                                  | Iso IgG | Iso IgG | Iso IgG | Iso IgG | Isotype                                      |
| 2                                  | CD3     | CD14    | CD45    | CD19    | T & B lymphocytes, monocytes                 |
| 3                                  | CD4     | CD8     | CD45    | CD3     | CD4+ and CD8+ T cells                        |
| <b>CD4+ T cell markers</b>         |         |         |         |         |                                              |
| 4                                  | CD27    | CD45RO  | CD4     | CD95    | Naïve/memory CD4+ T cells; Fas+ CD4+ T cells |
| 5                                  | CD3     | CD45RA  | CD4     | CD62L   | CM and EM CD4+ T cells                       |
| 6                                  | CD3     | CD45RO  | CD4     | HLA-DR  | Activated CD4+ T cells                       |
| 7                                  | CD3     | CD45RO  | CD4     | CCR5    | CCR5+CD4+ T cells                            |
| 8                                  | CD127   | CD25    | CD4     | CD3     | Regulatory CD4+ T cells                      |
| 9                                  | OX40    | ICOS    | CD4     | CD3     | Ox40+ and ICOS+CD4+ T cells                  |
| <b>CD8+ T cell markers</b>         |         |         |         |         |                                              |
| 10                                 | CD27    | CD45RA  | CD8     | CD3     | CM/early EM and EM CD8+ T cells              |
| 11                                 | CD27    | CD45RO  | CD8     | CD95    | Naïve/memory and Fas+CD8+ T cells            |
| 12                                 | CD38    | CD8     | CD3     | HLA-DR  | Activated CD8+ T cells                       |
| 13                                 | CD28    | CD103   | CD8     | CD3     | CD28+CD8+ T cells                            |
| 14                                 | CD27    | PD-1    | CD8     | CD3     | PD-1+CD8+ T cells                            |

**Supplementary Table 1. Fluorescent antibody panels used in the analyses.** Fluorescently conjugated antibody panels used for immunophenotypic analysis of whole blood samples are shown.

Supplementary Table 2.

| Parameter                                                                                                                                     | p-value           | q-value |
|-----------------------------------------------------------------------------------------------------------------------------------------------|-------------------|---------|
| <b>HLA-DR+CD45RO+ CD4+ T cells</b><br>TB-IRIS vs. non-TB-IRIS at W0: <i>frequency was higher TB-IRIS patients</i>                             | <b>&lt;0.0001</b> | 0.00067 |
| <b>Fas+ EM CD8+ T cells</b><br>TB-IRIS vs. non-TB-IRIS at W0: <i>frequency was higher in TB-IRIS patients</i>                                 | <b>&lt;0.0001</b> | 0.00067 |
| <b>CD4+ T regulatory cells</b><br>TB-IRIS vs. non-TB-IRIS: <i>post-ART decrease was greater in TB-IRIS patients</i>                           | <b>&lt;0.0001</b> | 0.00067 |
| <b>OX40+CD4+ T cells</b><br>TB-IRIS vs. non-TB-IRIS: <i>post-ART decrease was greater in TB-IRIS patients</i>                                 | <b>&lt;0.0001</b> | 0.00067 |
| <b>HLA-DR+CD45RO+ CD4+ T cells</b><br>Both groups: <i>difference between pre-week 8 and post-week 8 curve slopes</i>                          | <b>&lt;0.0001</b> | 0.00067 |
| <b>CD4+ T regulatory cells</b><br>TB-IRIS vs. non-TB-IRIS: <i>slowing of decrease post-week 8 was greater in TB-IRIS patients</i>             | <b>0.0001</b>     | 0.00067 |
| <b>CD62L-CD45RA- EM CD4+ T cells</b><br>TB-IRIS vs. non-TB-IRIS: <i>post-ART increase was greater in TB-IRIS patients</i>                     | <b>0.001</b>      | 0.004   |
| <b>CCR5+CD4+ T cells</b><br>Both groups: <i>difference between pre-week 8 and post-week 8 curve slopes</i>                                    | <b>0.001</b>      | 0.004   |
| <b>CD62L+CD45RA- CM CD4+ T cells</b><br>Both groups: <i>difference between pre-week 8 and post-week 8 curve slopes</i>                        | <b>0.001</b>      | 0.004   |
| <b>CD62L-CD45RA- EM CD4+ T cells</b><br>Both groups: <i>difference between pre-week 8 and post-week 8 curve slopes</i>                        | <b>0.001</b>      | 0.004   |
| <b>OX40+CD4+ T cells</b><br>TB-IRIS vs. non-TB-IRIS: <i>slowing of decrease post-week 8 was greater in TB-IRIS patients</i>                   | <b>0.002</b>      | 0.0073  |
| <b>CD62L-CD45RA- CM CD4+ T cells</b><br>TB-IRIS vs. non-TB-IRIS: <i>post-ART decrease was greater in TB-IRIS patients</i>                     | <b>0.004</b>      | 0.013   |
| <b>Fas+ EM CD4+ T cells</b><br>TB-IRIS vs. non-TB-IRIS: <i>post-ART increase was greater in TB-IRIS patients</i>                              | <b>0.005</b>      | 0.015   |
| <b>CCR5+CD4+ T cells</b><br>TB-IRIS vs. non-TB-IRIS at W0: <i>frequency was higher in TB-IRIS patients</i>                                    | <b>0.006</b>      | 0.017   |
| <b>Fas+ EM CD8+ T cells</b><br>TB-IRIS vs. non-TB-IRIS: <i>slowing of increase post-week 8 vs. pre-week 8 was greater in TB-IRIS patients</i> | <b>0.012</b>      | 0.032   |
| <b>OX40+CD4+ T cells</b><br>TB-IRIS vs. non-TB-IRIS at W0: <i>frequency was higher in TB-IRIS patients</i>                                    | <b>0.013</b>      | 0.033   |
| <b>CD27+CD45RA- CM/early EM CD8+ T cells</b><br>TB-IRIS vs. non-TB-IRIS at W0: <i>frequency was lower in TB-IRIS patients</i>                 | <b>0.017</b>      | 0.040   |
| <b>Fas+ EM CD4+ T cells</b><br>TB-IRIS vs. non-TB-IRIS: <i>slowing of increase post-week 8 vs pre-week 8 was greater in TB-IRIS patients</i>  | <b>0.030</b>      | 0.066   |
| <b>Fas+ EM CD8+ T cells</b><br>Both groups: <i>difference between pre-week 8 and post-week 8 curve slopes</i>                                 | <b>0.032</b>      | 0.066   |
| <b>CCR5+CD4+ T cells</b><br>TB-IRIS vs. non-TB-IRIS: <i>post-ART increase was greater in TB-IRIS patients</i>                                 | <b>0.033</b>      | 0.066   |
| <b>HLA-DR+CD38+ CD8+T cells</b><br>TB-IRIS vs. non-TB-IRIS: <i>post-ART decrease was lesser in TB-IRIS patients</i>                           | <b>0.041</b>      | 0.078   |
| CCR5+CD4+ T cells<br>TB-IRIS vs. non-TB-IRIS: <i>pre-week 8 vs. post-week 8 change in phenotype frequency</i>                                 | 0.050             | 0.091   |
| CD27-CD45RA- EM CD8+T cells<br>TB-IRIS vs. non-TB-IRIS at W0                                                                                  | 0.060             | 0.10    |
| CD28+CD8+ T cells<br>TB-IRIS vs. non-TB-IRIS: <i>evolution post-ART</i>                                                                       | 0.064             | 0.11    |
| PD1+CD8+ T cells<br>TB-IRIS vs. non-TB-IRIS: <i>evolution post-ART</i>                                                                        | 0.075             | 0.12    |

|                                                                                      |              |             |
|--------------------------------------------------------------------------------------|--------------|-------------|
| HLA-DR+CD45RO+ CD4+ T cells<br>TB-IRIS vs. non-TB-IRIS: evolution post-ART           | <b>0.094</b> | <b>0.14</b> |
| CD27+CD95-CD45RO-CD8+ T cells<br>TB-IRIS vs. non-TB-IRIS at W0                       | <b>0.19</b>  | <b>0.28</b> |
| ICOS+CD4+T cells<br>TB-IRIS vs. non-TB-IRIS at W0                                    | <b>0.35</b>  | <b>0.48</b> |
| FAS+ EM CD8+ T cells<br>TB-IRIS vs. non-TB-IRIS: evolution post-ART                  | <b>0.35</b>  | <b>0.48</b> |
| CD45RO-CD27+CD95-CD8+ T cells<br>TB-IRIS vs. non-TB-IRIS: evolution post-ART         | <b>0.36</b>  | <b>0.48</b> |
| ICOS+CD4+ T cells<br>TB-IRIS vs. non-TB-IRIS: evolution post-ART                     | <b>0.39</b>  | <b>0.50</b> |
| Fas+ EM CD4+ T cells<br>TB-IRIS vs. non-TB-IRIS at W0                                | <b>0.40</b>  | <b>0.50</b> |
| CD28+CD8+ T cells<br>TB-IRIS vs. non-TB-IRIS at W0                                   | <b>0.46</b>  | <b>0.56</b> |
| CD62L+CD45RA- CM CD4+ T cells<br>TB-IRIS vs. non-TB-IRIS at W0                       | <b>0.48</b>  | <b>0.56</b> |
| CD27-CD45RA- EM CD8+ T cells<br>TB-IRIS vs. non-TB-IRIS: evolution post-ART          | <b>0.56</b>  | <b>0.64</b> |
| PD1+CD8+T cells<br>TB-IRIS vs. non-TB-IRIS at W0                                     | <b>0.69</b>  | <b>0.76</b> |
| CD4+ T regulatory cells<br>TB-IRIS vs. non-TB-IRIS at W0                             | <b>0.72</b>  | <b>0.76</b> |
| CD27+CD45RA- CM/early EM CD8+ T cells<br>TB-IRIS vs. non-TB-IRIS: evolution post-ART | <b>0.85</b>  | <b>0.90</b> |
| HLA-DR+CD38+ CD8+T cells<br>TB-IRIS vs. non-TB-IRIS at W0                            | <b>0.91</b>  | <b>0.93</b> |
| CD62L-CD45RA- EM CD4+ T cells<br>TB-IRIS vs. non-TB-IRIS at W0                       | <b>0.96</b>  | <b>0.96</b> |

**Supplementary Table 2. False Discovery Rate (FDR) analysis of mixed effect linear regression models.** We used mixed effect linear regression models and performed FDR analysis to correct for multiple comparisons in order to identify the association of individual cellular phenotypes with TB-IRIS. As described in the Methods section, four unique comparisons were subjected to statistical testing: i) *TB-IRIS vs. non-TB-IRIS: W0*, which compared phenotype frequencies at ART initiation between TB-IRIS patients and non-TB-IRIS patients; ii) *TB-IRIS vs. non-TB-IRIS: evolution post-ART*, which compared the post-ART rate of change in individual phenotype frequencies between TB-IRIS and non-TB-IRIS patients; iii) *Both groups: slope pre- vs. post-week 8 of ART*, which analyzed whether the frequency of each cellular phenotype changed at a different rate post-week 8 of ART as compared to pre-week 8 of ART within the total patient cohort as measured by change in slope of curves; and iv) *TB-IRIS: slope pre- vs. post-week 8 of ART*, which analyzed whether differences in phenotype rate of change pre- versus post-week 8 of ART were significantly different between TB-IRIS and non-TB-IRIS patients. Overall, 21 significant differences ( $p < 0.05$ ) were found out of the 40 parameters studied. Parameters for which significant differences were detected are shown in bolded font. The estimated q-value was 0.078 for the largest significant p-value, indicating that only 2 of the 21 findings might not be significant.

## Supplementary Table 3.

| Phenotype                                                                      | p-value           | q-value |
|--------------------------------------------------------------------------------|-------------------|---------|
| <b>CCR5+CD4+ T cells (frequency was higher in TB-IRIS patients)</b>            | <b>&lt;0.0001</b> | 0.0015  |
| <b>HLA-DR+CD45RO+CD4+ T cells (frequency was higher in TB-IRIS patients)</b>   | <b>0.0003</b>     | 0.0023  |
| <b>Effector memory CD4+ T cells (frequency was higher in TB-IRIS patients)</b> | <b>0.0021</b>     | 0.011   |
| <b>Fas+ EM CD4+ T cells (frequency was higher in TB-IRIS patients)</b>         | <b>0.0035</b>     | 0.013   |
| <b>Central memory CD4+ T cells (frequency was lower in TB-IRIS patients)</b>   | <b>0.011</b>      | 0.032   |
| <b>CD4+ T regulatory cells (frequency was lower in TB-IRIS patients)</b>       | <b>0.034</b>      | 0.084   |
| Effector memory CD8+ T cells                                                   | 0.067             | 0.12    |
| Transitional memory CD8+ T cells                                               | 0.072             | 0.12    |
| Fas+ memory CD8+ T cells                                                       | 0.075             | 0.12    |
| OX40+CD4+ T cells                                                              | 0.150             | 0.23    |
| PD-1+CD8+ T cells                                                              | 0.190             | 0.26    |
| HLA-DR+CD38+ CD8+ T cells                                                      | 0.220             | 0.28    |
| CD27+CD45RO-Fas-CD8+ T cells                                                   | 0.540             | 0.62    |
| CD28+CD8+ T cell                                                               | 0.630             | 0.67    |
| ICOS+CD4+ T cells                                                              | 0.730             | 0.73    |

**Supplementary Table 3. False Discovery Rate (FDR) analysis using p- and q-values from Wilcoxon rank sum analysis of T cell phenotypes between TB-IRIS and non-TB-IRIS patients at week 34 post-TB therapy.** Bolded parameters/p-values indicate cellular phenotypes that were present at significantly different frequencies at week 34 post-TB therapy initiation. The estimated q-value was 0.084 for the largest significant p-value, indicating that the six significant differences that were detected are truly significant.

## Supplementary Table 4.

| Phenotype                                                                       | p-value       | q-value |
|---------------------------------------------------------------------------------|---------------|---------|
| <b>HLA-DR+CD45RO+CD4+ T cells (increase was greater in TB-IRIS patients)</b>    | <b>0.0023</b> | 0.026   |
| <b>CCR5+CD4+ T cells (increase was greater in TB-IRIS patients)</b>             | <b>0.0035</b> | 0.026   |
| <b>CD27+CD95-CD45RO-CD8+ T cells (increase was greater in TB-IRIS patients)</b> | <b>0.0085</b> | 0.043   |
| Transitional memory CD8+ T cells                                                | 0.078         | 0.29    |
| HLA-DR+CD38+ T cells                                                            | 0.14          | 0.35    |
| CD28+CD8+ T cells                                                               | 0.14          | 0.35    |
| Effector memory CD4+ T cells                                                    | 0.16          | 0.35    |
| PD1+CD8+ T cells                                                                | 0.31          | 0.58    |
| CD4+ T regulatory cells                                                         | 0.40          | 0.66    |
| Fas+ EM CD4+ T cells                                                            | 0.44          | 0.66    |
| Central memory CD4+ T cells                                                     | 0.51          | 0.70    |
| OX40+CD4+ T cells                                                               | 0.62          | 0.73    |
| Effector memory CD8+ T cells                                                    | 0.63          | 0.73    |
| ICOS+CD4+ T cells                                                               | 0.77          | 0.83    |
| Fas+ EM CD8+ T cells                                                            | 0.89          | 0.89    |

**Supplementary Table 4. False Discovery Rate (FDR) analysis using p- and q-values from Wilcoxon rank sum analysis of net change in cellular phenotype frequencies between ART initiation and week 2 or the TB-IRIS event.** Bolded parameters/p-values indicate cellular phenotypes that showed relatively greater increase in frequency between week 0 of ART and week 2 for non-TB-IRIS patients or the TB-IRIS event for TB-IRIS patients. The estimated q-value for the largest significant p-value was 0.043, indicating that the three significant differences detected are truly significant.

## Supplementary Table 5.

A

| Cytokine                                                   | p-value       | q-value |
|------------------------------------------------------------|---------------|---------|
| <b>IL-10 (higher in TB-IRIS patients)</b>                  | <b>0.0030</b> | 0.036   |
| <b>IL-8 (higher in TB-IRIS patients)</b>                   | <b>0.019</b>  | 0.10    |
| <b>IL-6 (higher in TB-IRIS patients)</b>                   | <b>0.026</b>  | 0.10    |
| <b>IL-1<math>\beta</math> (higher in TB-IRIS patients)</b> | <b>0.045</b>  | 0.14    |
| IL-17A                                                     | 0.10          | 0.24    |
| GM-CSF                                                     | 0.19          | 0.34    |
| IL-12                                                      | 0.20          | 0.34    |
| TNF                                                        | 0.26          | 0.37    |
| IFN- $\gamma$                                              | 0.28          | 0.37    |
| IL-4                                                       | 0.53          | 0.64    |
| IL-2                                                       | 0.72          | 0.76    |
| IL-7                                                       | 0.99          | 0.99    |

Comparison of plasma cytokines at week 0 between non-TB-IRIS patients and TB-IRIS patients.

B

| Cytokine                                                   | p-value       | q-value |
|------------------------------------------------------------|---------------|---------|
| <b>IL-6 (higher in TB-IRIS patients)</b>                   | <b>0.0001</b> | 0.0012  |
| <b>IL-1<math>\beta</math> (higher in TB-IRIS patients)</b> | <b>0.0002</b> | 0.0012  |
| <b>IL-10 (higher in TB-IRIS patients)</b>                  | <b>0.0025</b> | 0.010   |
| <b>IL-8 (higher in TB-IRIS patients)</b>                   | <b>0.0064</b> | 0.019   |
| <b>IL-12 (higher in TB-IRIS patients)</b>                  | <b>0.022</b>  | 0.053   |
| <b>IL-17A (higher in TB-IRIS patients)</b>                 | <b>0.047</b>  | 0.089   |
| <b>TNF (higher in TB-IRIS patients)</b>                    | <b>0.05</b>   | 0.089   |
| GM-CSF                                                     | 0.16          | 0.24    |
| IFN- $\gamma$                                              | 0.64          | 0.73    |
| IL-7                                                       | 0.64          | 0.73    |
| IL-2                                                       | 0.67          | 0.73    |
| IL-4                                                       | 0.79          | 0.79    |

Comparison of plasma cytokines at the week 2 timepoint (for non-TB-IRIS patients) vs. at the TB-IRIS event (TB-IRIS patients).

C

| Cytokine                                                             | p-value       | q-value |
|----------------------------------------------------------------------|---------------|---------|
| <b>IL-6 (increase greater in TB-IRIS patients)</b>                   | <b>0.0069</b> | 0.083   |
| <b>IL-1<math>\beta</math> (increase greater in TB-IRIS patients)</b> | <b>0.027</b>  | 0.16    |
| GM-CSF                                                               | 0.14          | 0.54    |
| IL-7                                                                 | 0.19          | 0.57    |
| IL-12                                                                | 0.26          | 0.62    |
| IL-8                                                                 | 0.44          | 0.82    |
| IFN- $\gamma$                                                        | 0.48          | 0.82    |
| IL-2                                                                 | 0.63          | 0.90    |
| IL-4                                                                 | 0.68          | 0.90    |
| IL-10                                                                | 0.78          | 0.94    |
| IL-17A                                                               | 0.92          | 0.94    |
| TNF                                                                  | 0.94          | 0.94    |

Net change in plasma cytokines between week 0 at week 2 (non-TB-IRIS patients) vs. between week 0 and the TB-IRIS event (TB-IRIS patients).

**Supplementary Table 5. False Discovery Rate (FDR) analysis using p- and q-values from Wilcoxon rank sum analyses of absolute plasma cytokines at ART initiation and week 2 or the TB-IRIS event (A&B) or net change in cytokine concentration between these timepoints (C).** A) Cytokine differences at ART initiation, with significant differences indicated in bolded text. B) Cytokine differences at the week 2 timepoint in non-TB-IRIS patients versus at the time of the TB-IRIS event in TB-IRIS patients, with significant differences indicated in bolded text. C) Differences in net increase of each cytokine between W0 and W2 in non-TB-IRIS patients as compared to between W0 and the TB-IRIS event in TB-IRIS patients, with significant differences indicated in bold text. The calculated q-values indicate that all findings determined to be significant by p-value are truly significant.



**Supplementary Table 6.**

|                                                 | Non-IRIS<br>(n=104) | IRIS<br>(n=50) | p value |
|-------------------------------------------------|---------------------|----------------|---------|
| Male sex no. of patients (%)                    | 63 (60)             | 40 (80)        | 0.02    |
| Age -years                                      |                     |                |         |
| Median                                          | 35.0                | 34.5           | 0.71    |
| Interquartile range                             | 29-41.5             | 30-42          |         |
| Body mass index kg/m <sup>2</sup>               |                     |                |         |
| Median                                          | 16.6                | 16.9           | 0.44    |
| Interquartile range                             | 15.2-18.5           | 15.5-19.1      |         |
| CD4 T cell count per mm <sup>3</sup>            |                     |                |         |
| Median                                          | 32.0                | 24.5           | 0.11    |
| Interquartile range                             | 14-71               | 12-45          |         |
| Viral load log <sub>10</sub> copies/ml          |                     |                |         |
| Median                                          | 5.7                 | 5.8            | 0.16    |
| Interquartile range                             | 5.3-5.9             | 5.4-6.3        |         |
| Karno performance score-<br>no. of patients (%) |                     |                | 0.11    |
| ≥80                                             | 7 (6)               | 9 (18)         |         |
| 60-70                                           | 70 (67)             | 31 (62)        |         |
| ≤50                                             | 27 (26)             | 10 (20)        |         |
| Hemoglobin g/dl                                 |                     |                |         |
| Median                                          | 86.0                | 82.5           | 0.34    |
| Interquartile range                             | 76-104              | 65-105         |         |

**Supplementary Table 6. Baseline patient characteristics of Capri-T study participants.**

## REFERENCES FOR SUPPLEMENTAL INFORMATION SECTION

*References also found in main text of article and numbered as below:*

1. Blanc FX, Sok T, Laureillard D, Borand L, Rekacewicz C, Nerrienet E, *et al.* Earlier versus later start of antiretroviral therapy in HIV-infected adults with tuberculosis. *N Engl J Med* 2011,**365**:1471-1481.

7. Laureillard D, Marcy O, Madec Y, Chea S, Chan S, Borand L, *et al.* Paradoxical tuberculosis-associated immune reconstitution inflammatory syndrome after early initiation of antiretroviral therapy in a randomized clinical trial. *AIDS* 2013,**27**:2577-2586.

29. Pean P, Nerrienet E, Madec Y, Borand L, Laureillard D, Fernandez M, *et al.* Natural killer cell degranulation capacity predicts early onset of the immune reconstitution inflammatory syndrome (IRIS) in HIV-infected patients with tuberculosis. *Blood* 2012,**119**:3315-3320.

*References specific to Supplemental Information section:*

Supplemental Reference 1. De Rosa SC, Mitra DK, Watanabe N, Herzenberg LA, Herzenberg LA, Roederer M. Vdelta1 and Vdelta2 gammadelta T cells express distinct surface markers and might be developmentally distinct lineages. *J Leukoc Biol* 2001,**70**:518-526.

Supplemental Reference 2. Bucy RP, Chen CL, Cooper MD. Tissue localization and CD8 accessory molecule expression of T gamma delta cells in humans. *J Immunol* 1989,**142**:3045-3049.

Supplemental Reference 3. Fenoglio D, Poggi A, Catellani S, Battaglia F, Ferrera A, Setti M, *et al.* Vdelta1 T lymphocytes producing IFN-gamma and IL-17 are expanded in HIV-1-infected patients and respond to *Candida albicans*. *Blood* 2009,**113**:6611-6618.
